# Supplementary material for: Serum Response Factor (SRF) Drives the Transcriptional Upregulation of the MDM4 Oncogene in HCC
Source: Cancers (Basel). 2021 Jan 8;13(2):199. doi: 10.3390/cancers13020199 (PMC7829828; doi:10.3390/cancers13020199)
Supplement: Supplementary file 1 [file cancers-13-00199-s001.pdf]

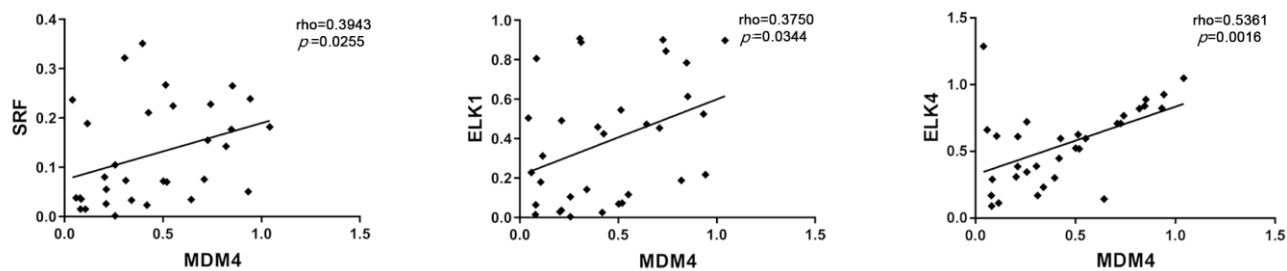

**Figure S1.** *MDM4* correlates with *SRF*, *ELK1* and *ELK4* at expression levels. A positive association was detected between *MDM4* and *SRF*, *ELK1*, *ELK4* mRNA levels in human HCC specimens of a second cohort ( $n = 32$ ).

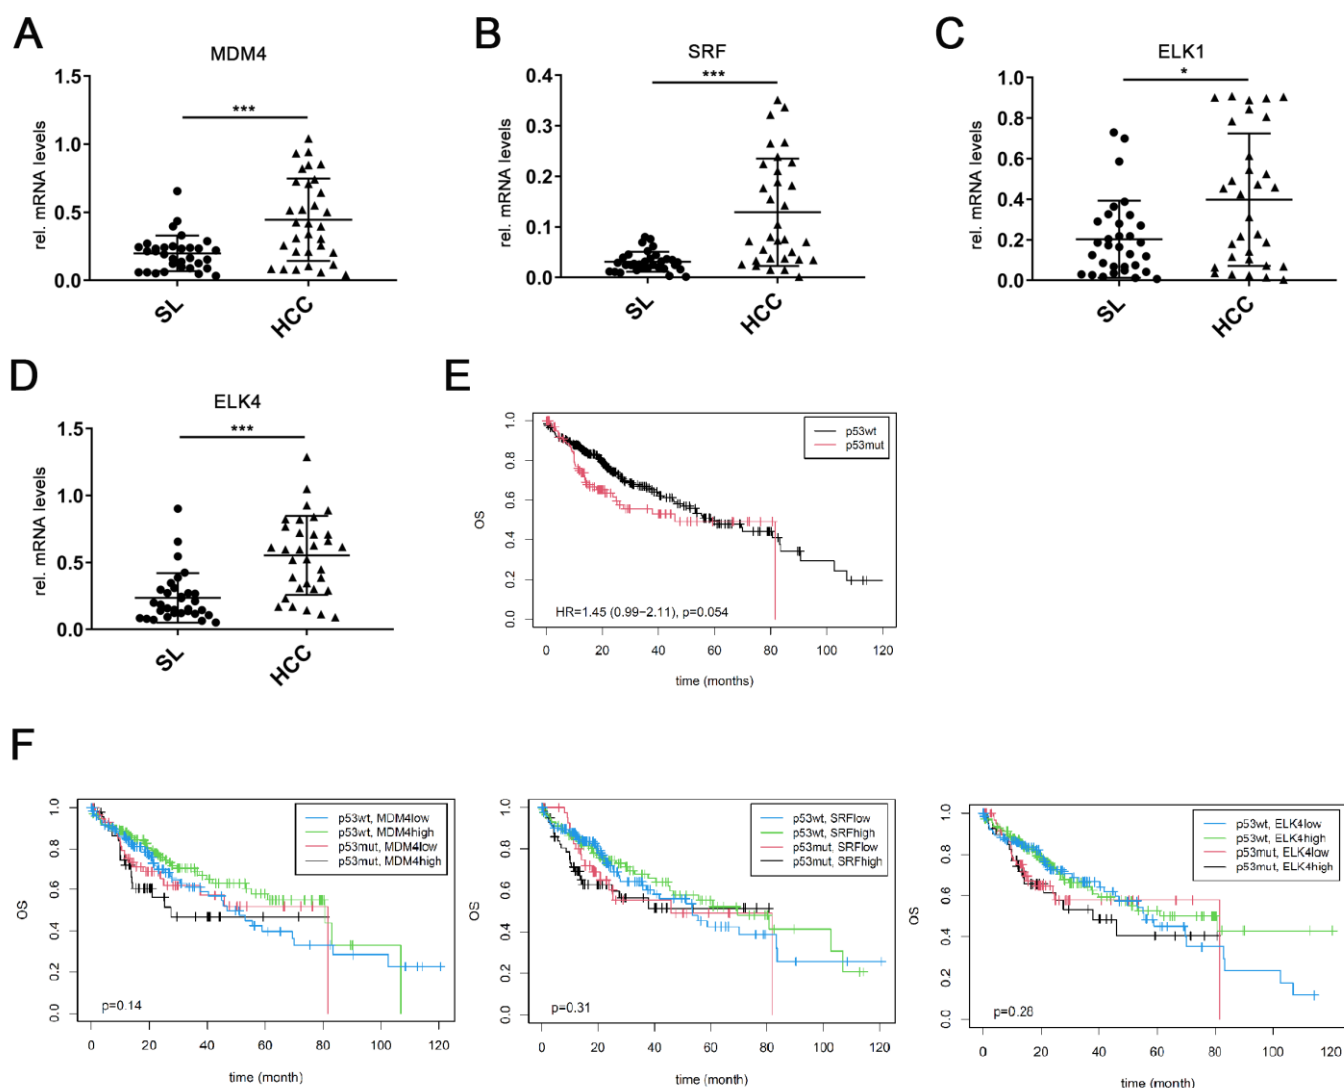

**Figure S2.** *MDM4* is upregulated in human HCC. (A) *MDM4* mRNA levels were increased in a second cohort of human HCCs compared to their corresponding non-tumor surrounding liver tissues ( $n = 32$ ). Similar results were observed for (B) *SRF*, (C) *ELK1* and (D) *ELK4* in these samples. (E) Overall survival analysis revealed no difference between *p53* wildtype and *p53* mutated human HCC groups in the TCGA data set. (F) Similar results were observed after stratification in *p53* wildtype respectively mutated cases with low and high expression of *MDM4*, *SRF*, and *ELK4*. in the LIHC cohort. Abbreviations: SL, non-tumor surrounding liver tissues; HCC, hepatocellular carcinoma specimens; OS, overall survival. Mann-Whitney U test (panel A–D) and Log-rank test (E–F): \*  $p < 0.05$ ; \*\*\*  $p < 0.001$ .

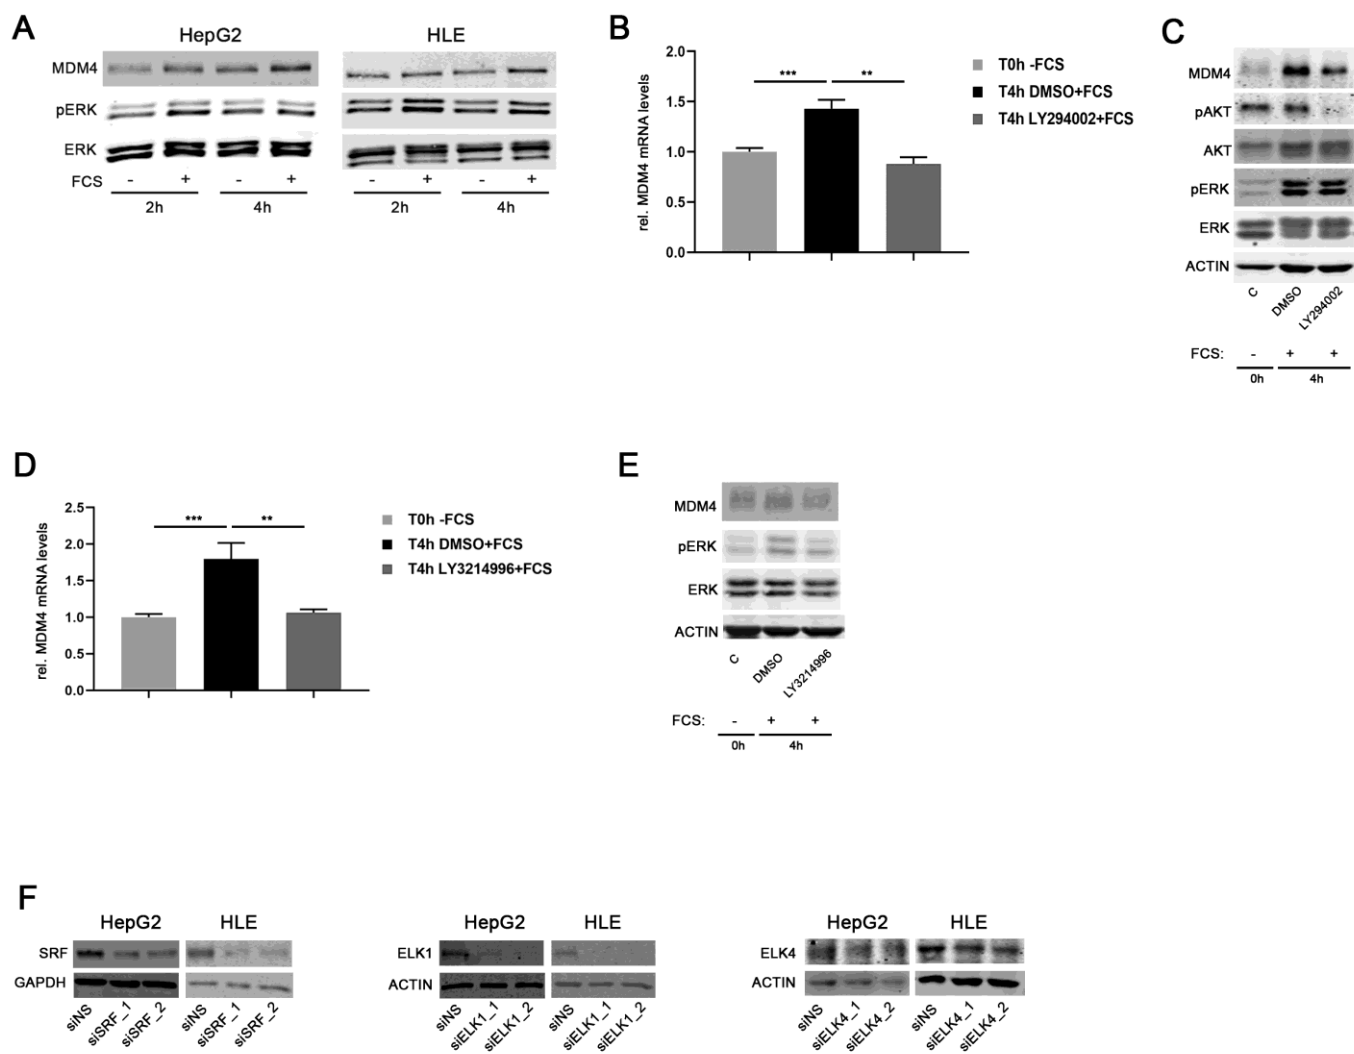

**Figure S3.** MDM4 protein induction upon FCS stimulation. (A) Increased MDM4 protein levels were observed in HepG2 and HLE 4h following FCS stimulation compared to starved control cells. (B–C) The PI3K inhibitor LY294002 rescued FCS-induced upregulation of *MDM4* mRNA and protein levels in serum-starved HepG2 cells. Efficient inhibition of PI3K pathway was demonstrated by reduced AKT phosphorylation compared to untreated cells. Phosphorylation of ERK confirms the efficacy of FCS stimulation in comparison to overnight starved cells. (D–E) The ERK inhibitor LY3214996 rescued FCS-induced upregulation of MDM4 mRNA and protein levels in serum-starved HepG2. (F) Representative Western blots showing reduced expression of SRF, ELK1, and ELK4 proteins upon inhibition using gene-specific siRNAs in cell used for the luciferase assays. Kruskal-Wallis followed by Dunn's test: \*\*  $p < 0.01$ , \*\*\*  $p < 0.0001$ .

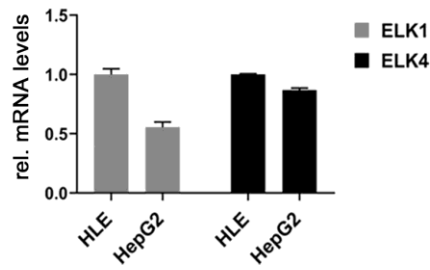

**Figure S4.** *ELK1* and *ELK4* expression levels in HCC cell lines. *ELK4* expression levels were similar between HepG2 and HLE cells, while the *ELK1* mRNA expression was lower in HepG2 cells compared to HLE cells.

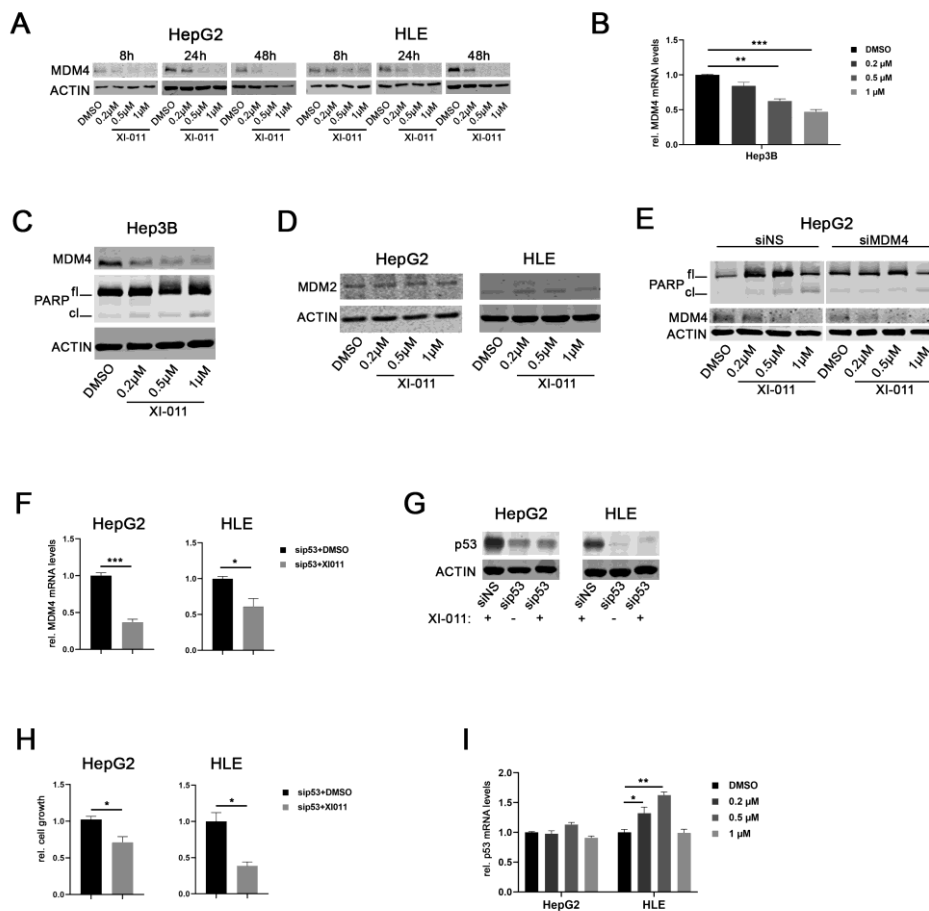

**Figure S5.** XI-011 induced biological effects are mediated by altered MDM4 levels independent from the *p53* gene status. (A) MDM4 protein levels in HepG2 and HLE cells at different time points following XI011 treatment as indicated. (B–C) Downregulation of *MDM4* mRNA and protein levels and induction of cleaved PARP protein was observed in Hep3B cells treated for 16 h with XI-011. (D) Representative Western blots evidenced no significant changes of MDM2 protein levels in both HCC cell lines treated for 16h using XI-011 compared to DMSO-treated control cells. (E) siRNA-mediated knock-down of MDM4 reduced PARP cleavage following XI-011 treatment in HepG2 cells compared to siNS-transfected controls. (F) XI-011 treatment leads to downregulation of *MDM4* mRNA following siRNA-mediated knockdown of *p53* expression in HepG2 and HLE cells. (G) Representative Western blotting images demonstrate efficacy of *p53* knock-down in comparison to siNS transfected cells. (H) Cell growth was significantly diminished following *p53* siRNA transfection combined with XI-011 treatment when normalized to control cells. (I) Relative *p53* mRNA expression following XI-011 treatment using the indicated doses in HepG2 and HLE cells. Mann-Whitney U test (panel F and H) or Kruskal-Wallis followed by Dunn's test (panel B and I) were used: \*  $p < 0.05$ , \*\*  $p < 0.01$ , \*\*\*  $p < 0.001$ . Abbreviations: siNS, scrambled, nonsense siRNA; siMDM4, siRNA specifically targeting MDM4; sip53, siRNA specifically targeting *p53*; fl, full-length PARP protein; cl, cleaved PARP protein.

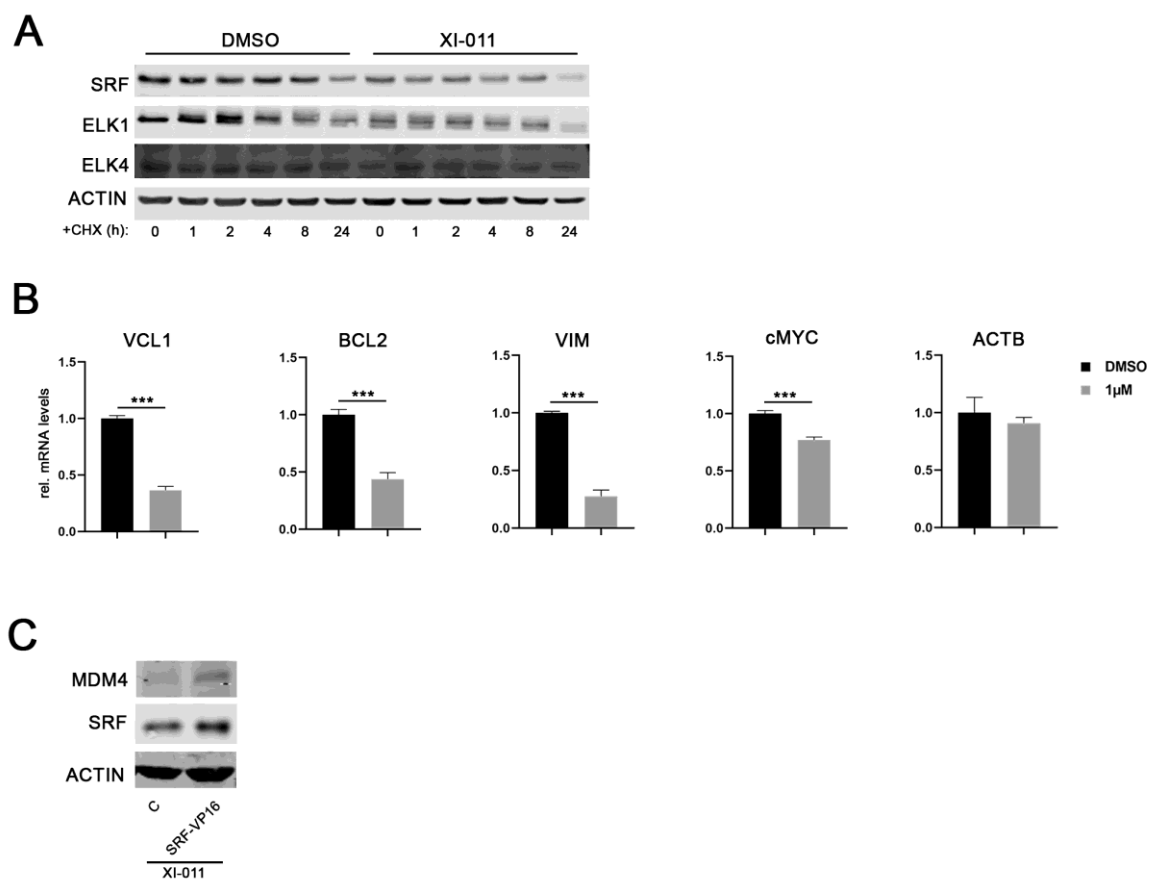

**Figure S6.** The half-life time of TF regulating *MDM4* transcription is not affected by XI-011 treatment in HCC cells. **(A)** The transcription factor (TF) protein half-life time was not altered following combined XI-011 (1  $\mu$ M) cycloheximide (CHX) treatment in HLE compared to control cells. **(B)** XI-011 treatment results in reduced expression of most SRF target genes. **(C)** Overexpression of SRF prevented reduction of MDM4 protein following XI-011 treatment in HepG2 compared to control cells. Mann-Whitney U test was used: \*\*\*  $p < 0.001$ .

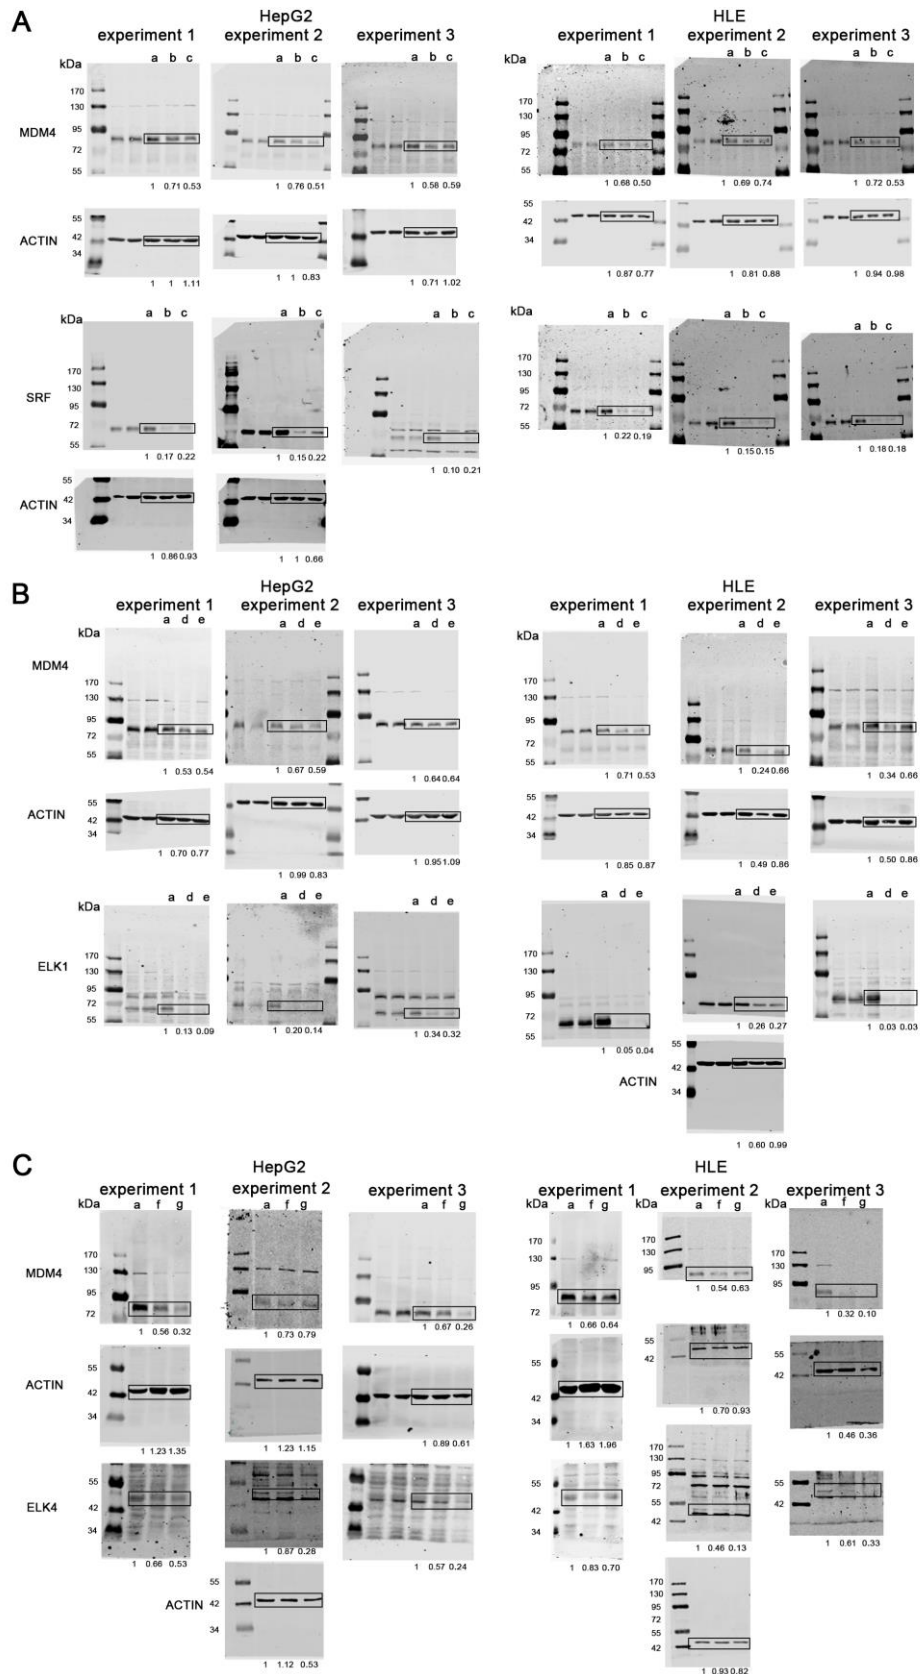

**Figure S7.** Western blotting image source. (A–C) Original Western blotting images displayed in Figure 2C,E,G and included in the corresponding protein level quantification histograms. Relative signal quantification is indicated below each corresponding band after normalization with control sample (a). Experiment 1 images are displayed in the main figure. Abbreviations: a, siNS scrambled, nonsense; b and c, siSRF\_1 and \_2, siRNA 1 and 2 specifically targeting SRF; d and e, siELK1\_1 and \_2, siRNA 1 and 2 specifically targeting ELK1; f and g, siELK4\_1 and \_2, siRNA 1 and 2 specifically targeting ELK4.

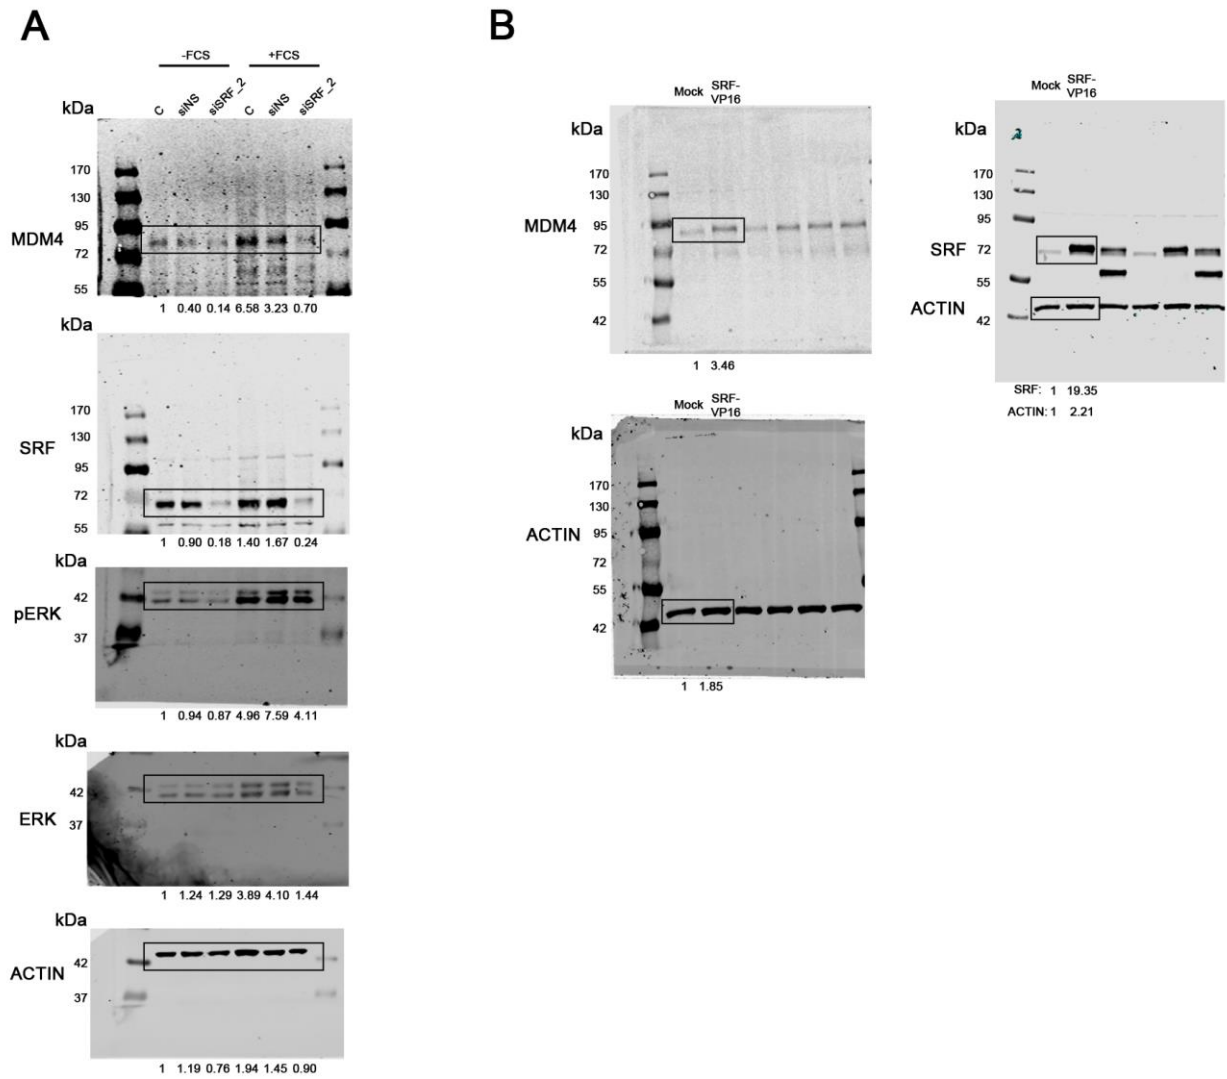

**Figure S8.** Western blotting image source. (A–C) Original Western blotting images included in Figure 2H and I. Densitometric quantification is indicated below each corresponding band after comparison with control sample.

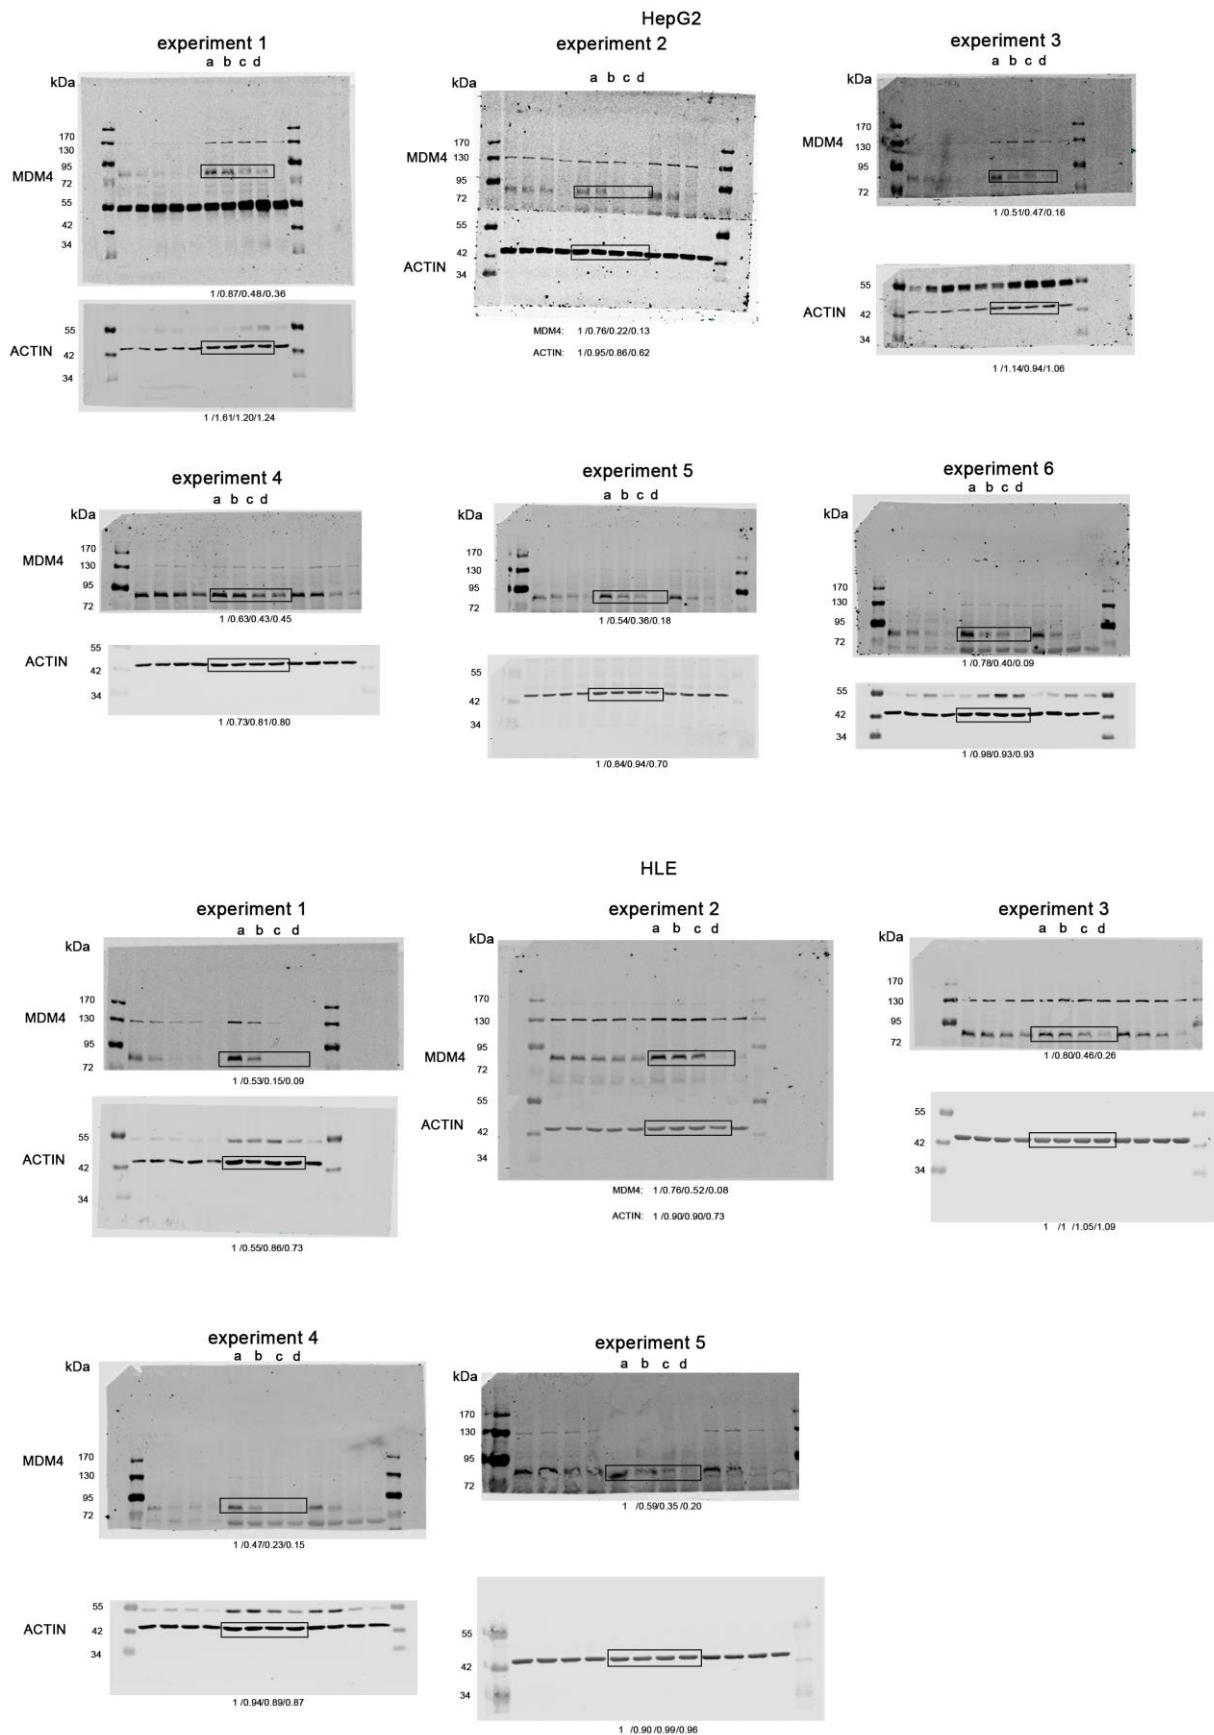

**Figure S9.** Western blotting image source. Original Western blotting images displayed in Figure 6B and included in the histogram describing MDM4 protein levels. Densitometric quantification is indicated below each corresponding band after comparison with DMSO control (a). Experiment 1 images are displayed in the main figure. Abbreviations: a, DMSO; b, 0.2  $\mu$ M XI-011; c, 0.5  $\mu$ M XI-011; d, 1  $\mu$ M XI-011.

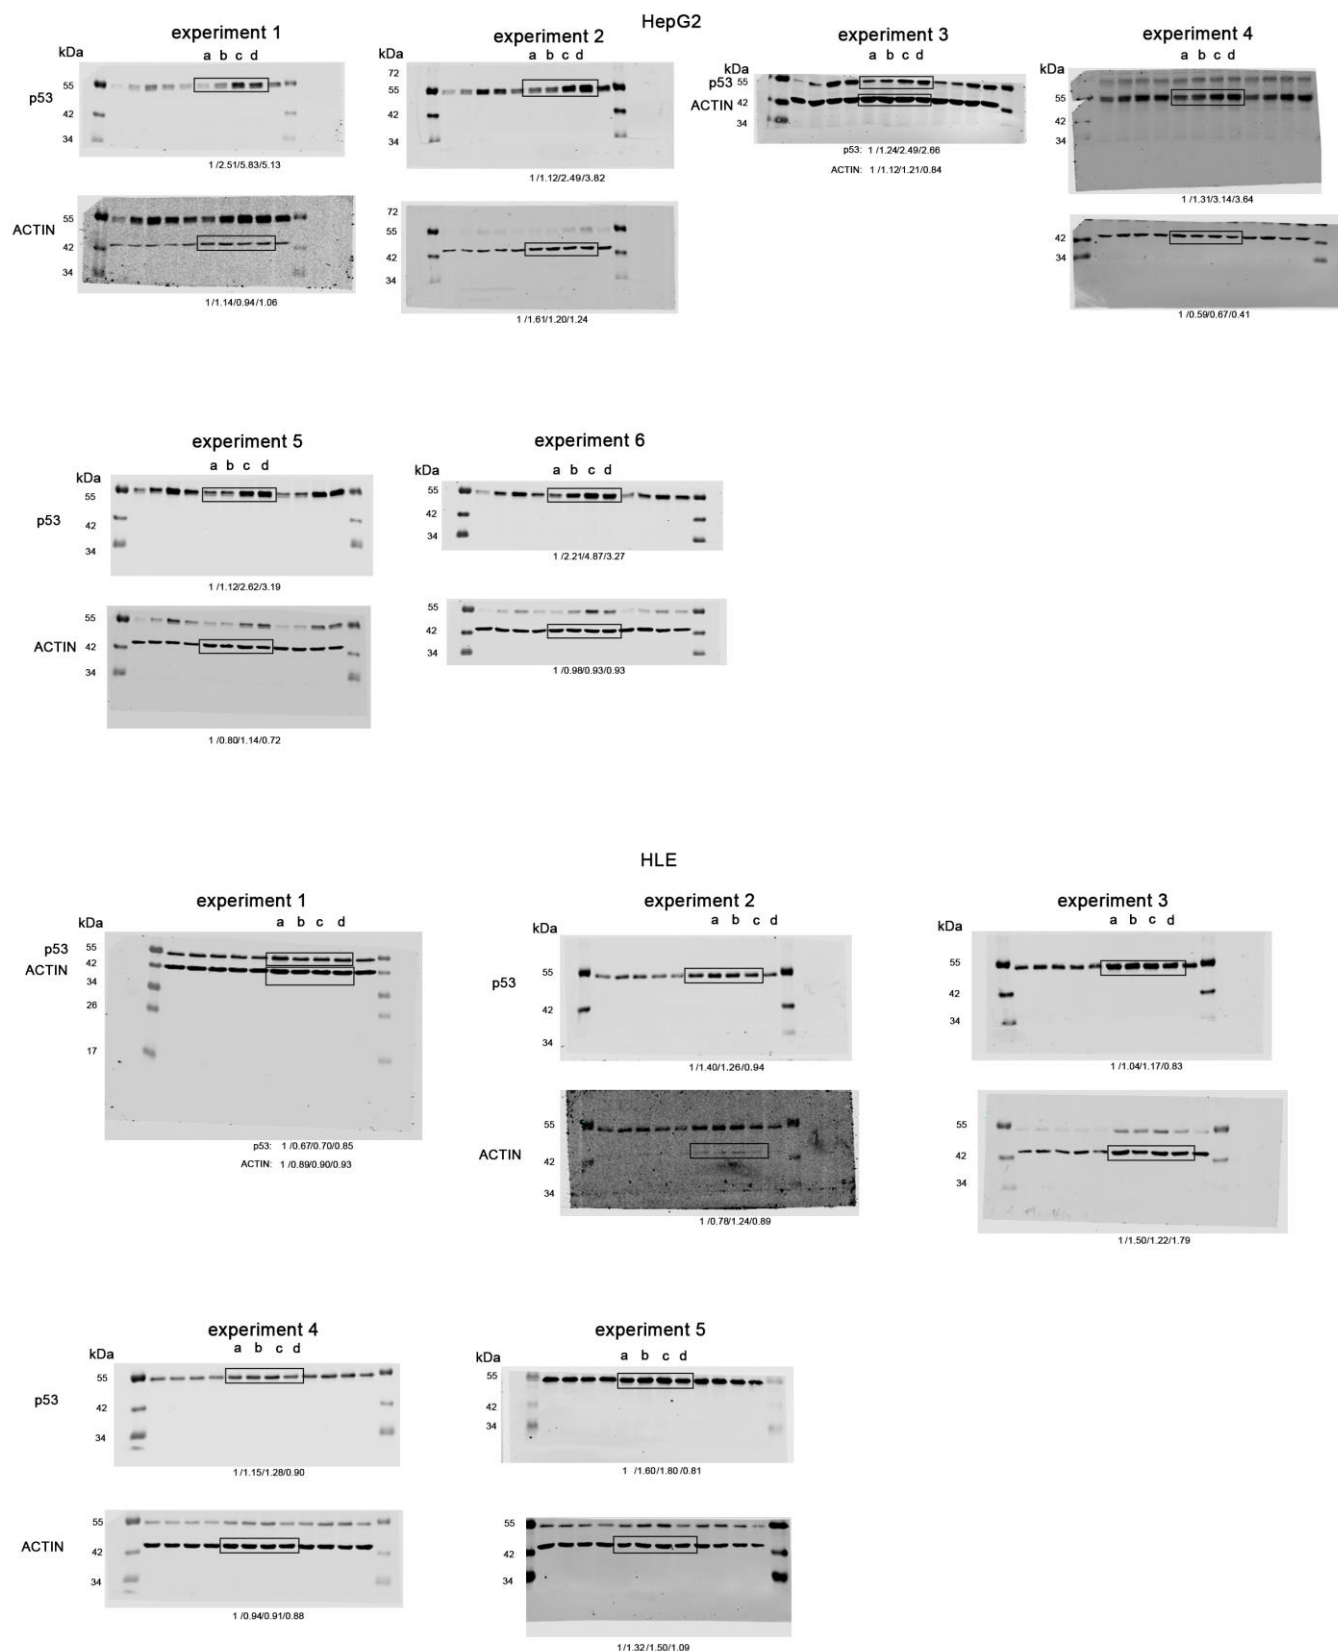

**Figure S10.** Western blotting image source. Original Western blotting images displayed in Figure 6D and included in the p53 protein level histogram. Densitometric quantification is indicated below each corresponding band after comparison with DMSO control (a). Experiment 1 images are displayed in the main figure. Abbreviations: a, DMSO; b, 0.2  $\mu$ M XI-011; c, 0.5  $\mu$ M XI-011; d, 1  $\mu$ M XI-011.

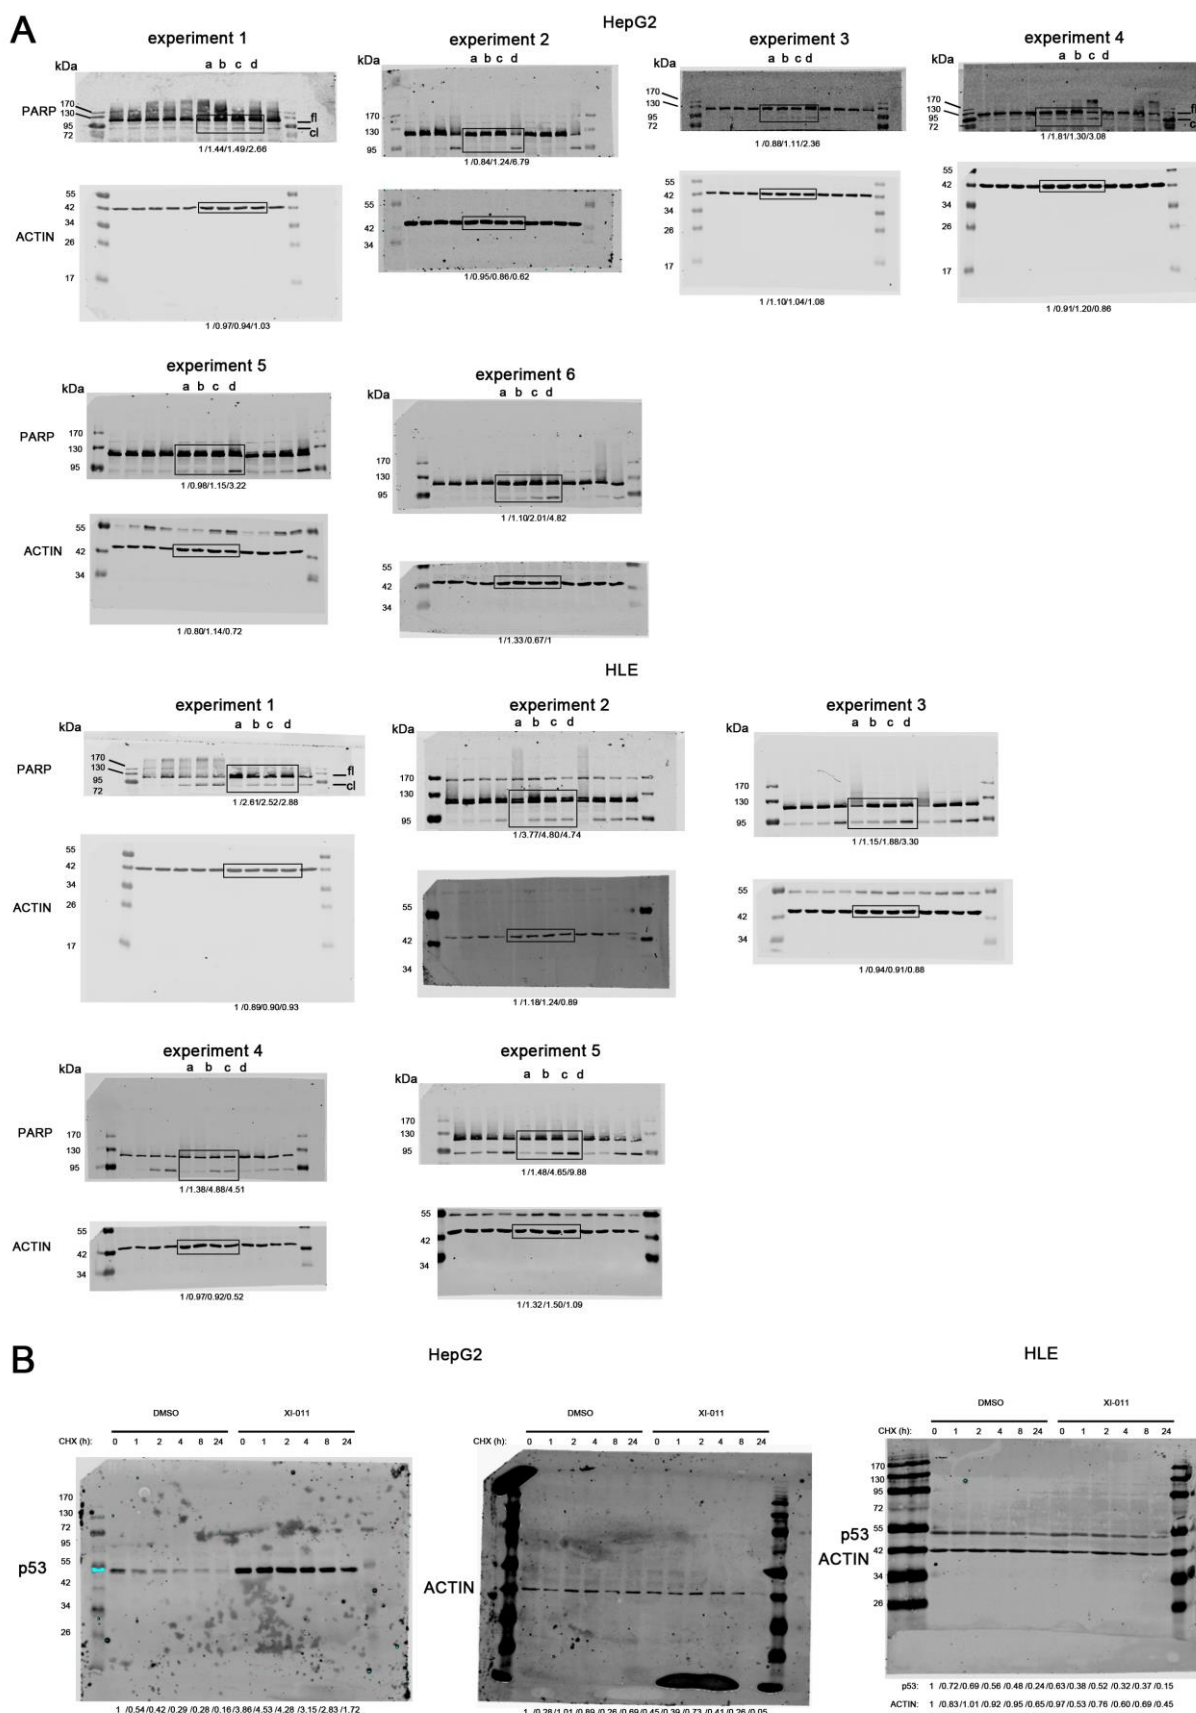

**Figure S11.** Western blotting image source. (A) Original Western blotting images displayed in Figure 6D and included in the PARP cleaved protein level graph. (B) Whole blot images shown in Figure 6F. Cleaved PARP densitometric quantification is indicated below each corresponding band after comparison with DMSO control (a) in panel A or lane 1 in panel B). Experiment 1 images are displayed in the main figure. Abbreviations: a, DMSO; b, 0.2  $\mu$ M XI-011; c, 0.5  $\mu$ M XI-011; d, 1  $\mu$ M XI-011; CHX, cycloheximide.

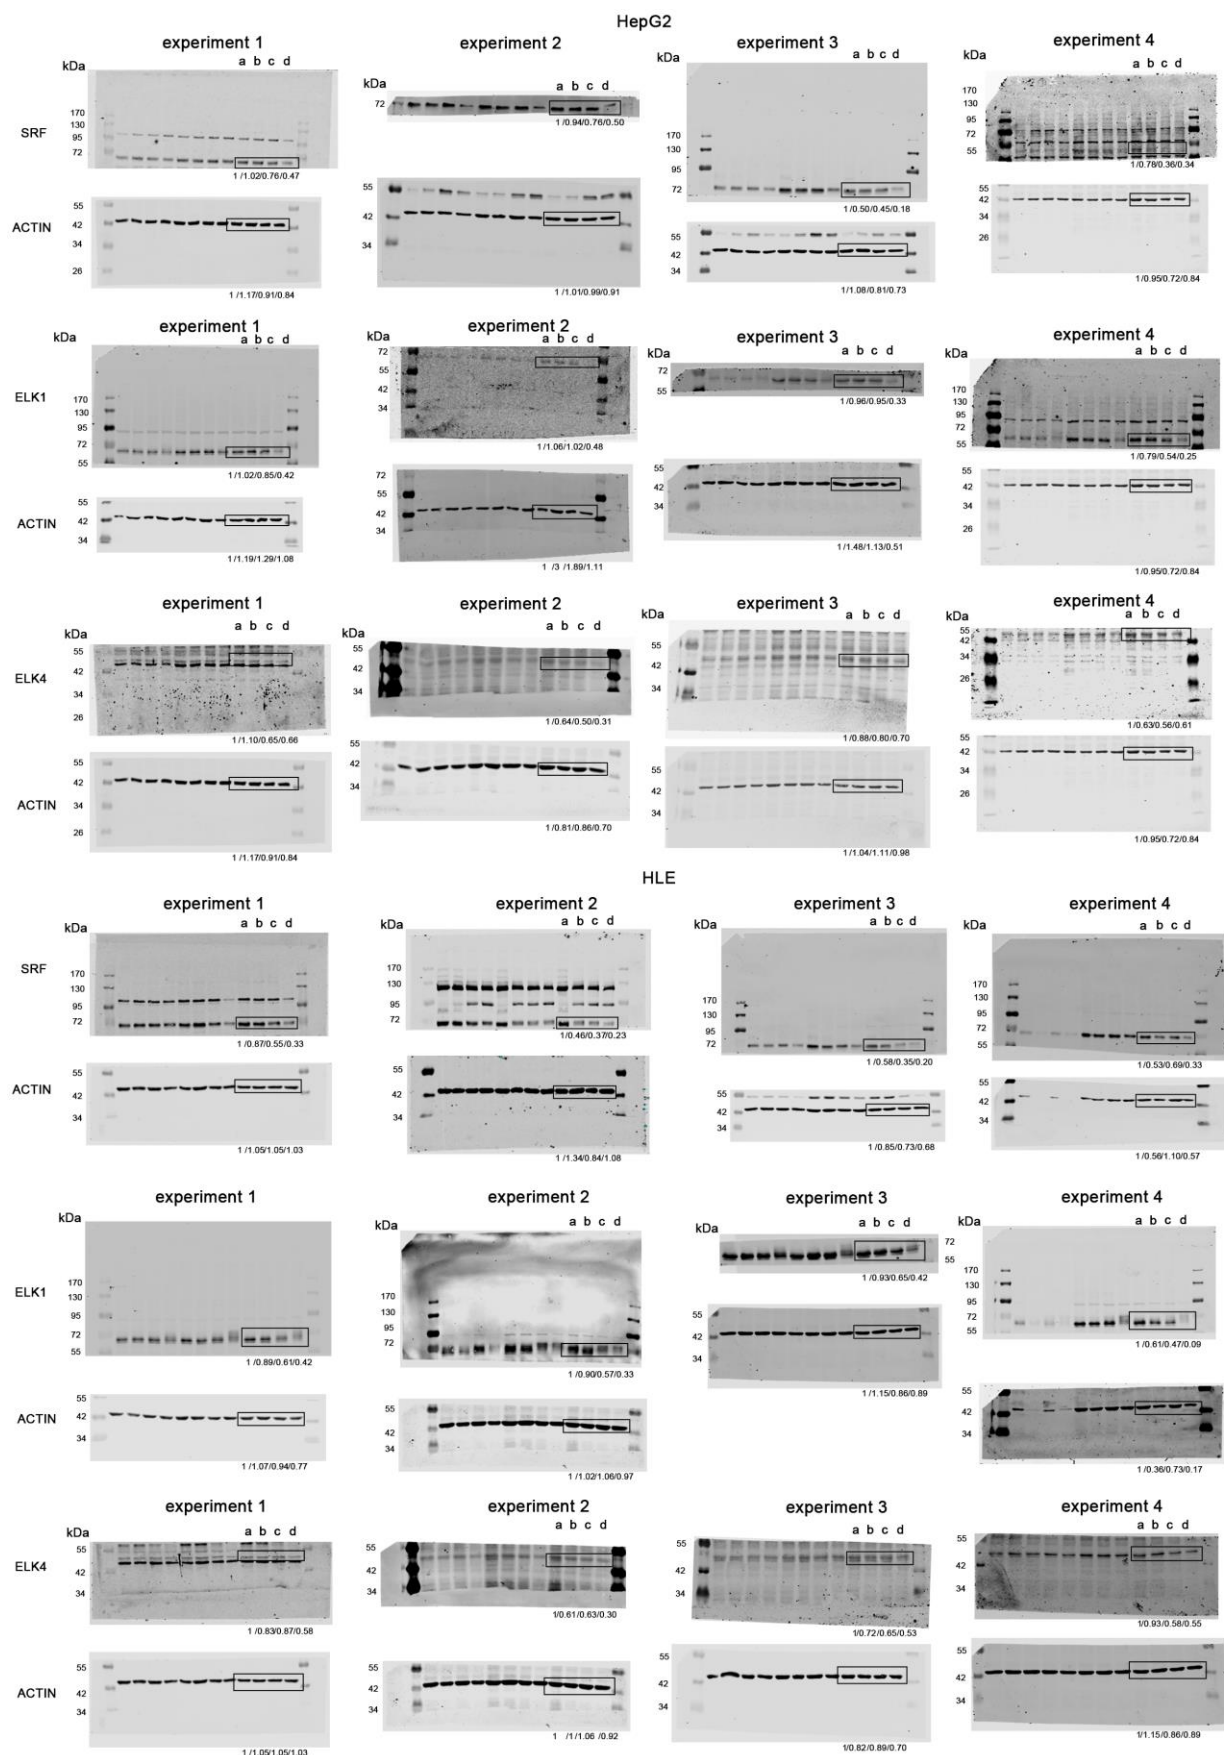

**Figure S12.** Western blotting image source. Original Western blotting images displayed in Figure 6H and included in the protein level graphs. Densitometric quantification is indicated below each corresponding band after comparison with DMSO control (a). Experiment 1 images are displayed in the main figure. Abbreviations: a, DMSO; b, 0.2  $\mu$ M XI-011; c, 0.5  $\mu$ M XI-011; d, 1  $\mu$ M XI-011.

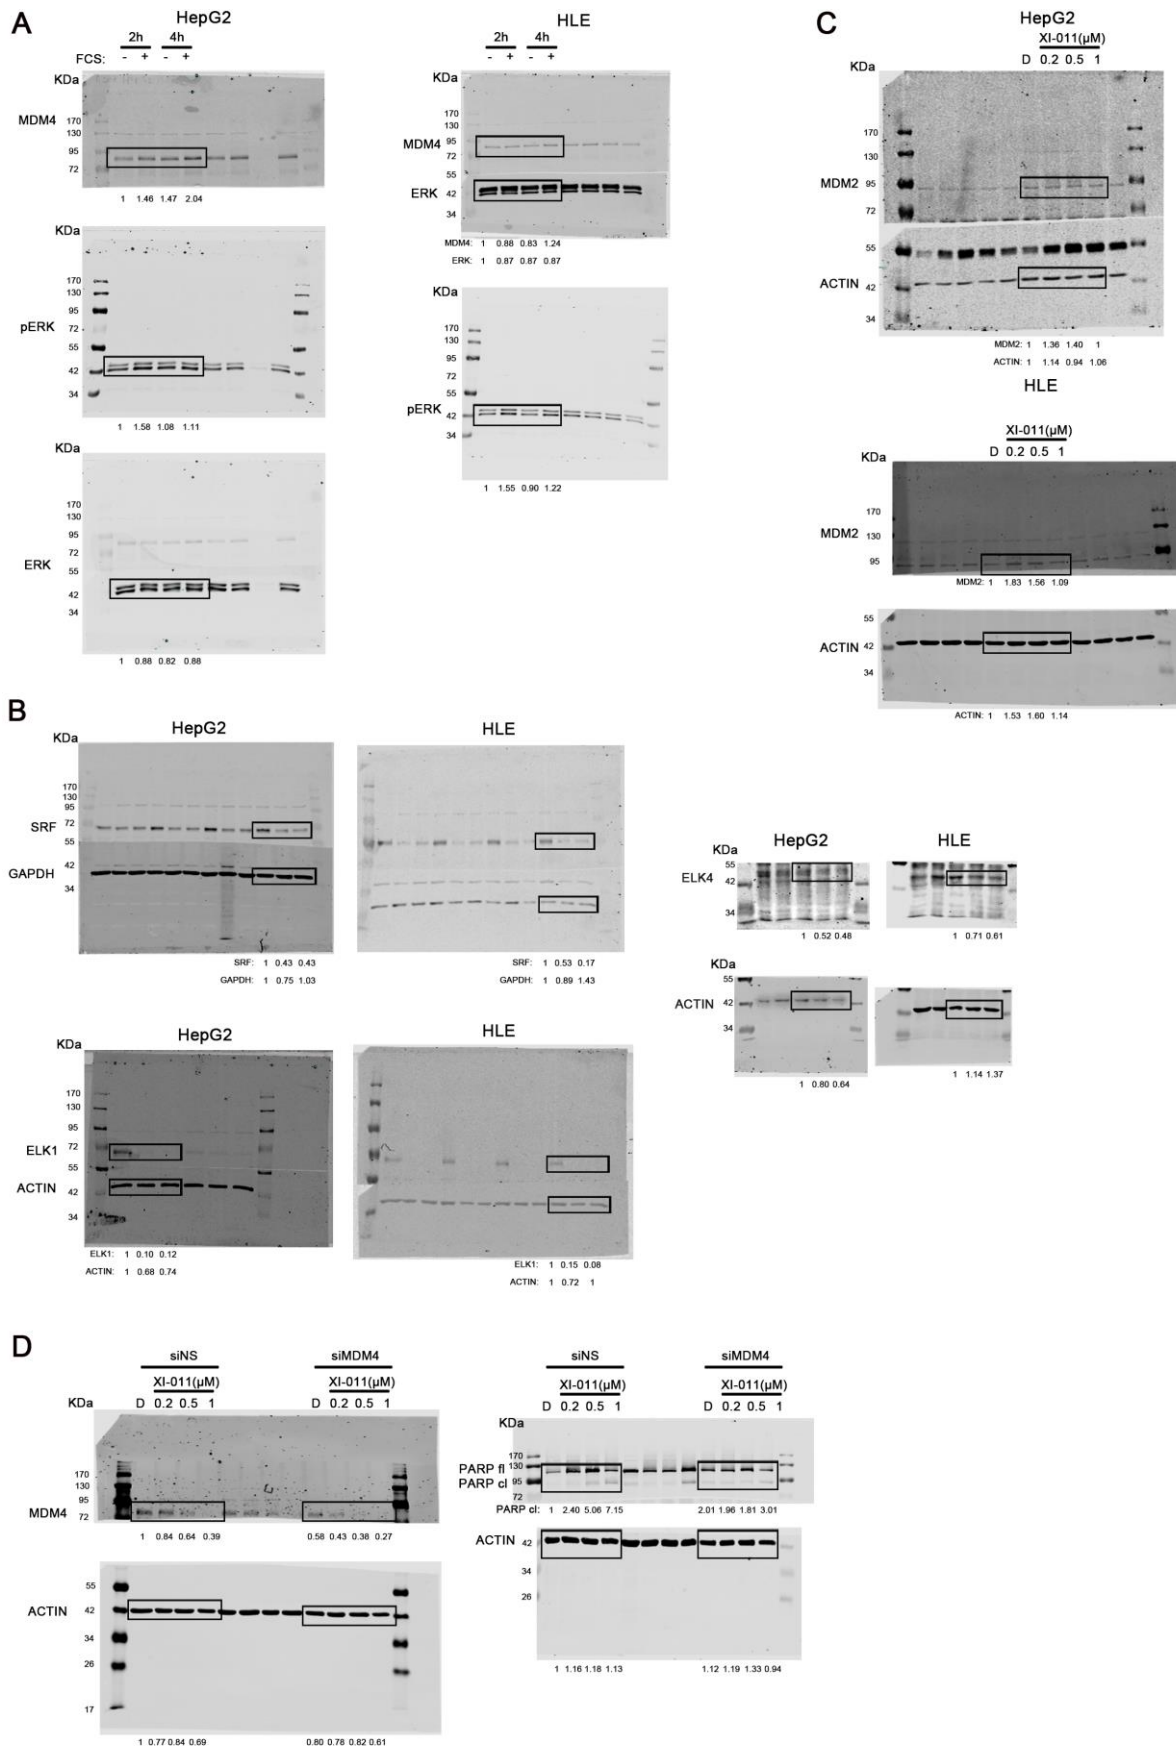

**Figure S13.** Western blotting image source. (A) Original Western blots included in Figure S3A. (B) Original Western blots shown in Figure S3F. (C) Original Western blots shown in Figure S5D. (D) Original Western blots shown in Figure S5E. Densitometric quantification is indicated below each corresponding band after comparison with the first lane included in the indicated black boxes. Abbreviations: D, DMSO.

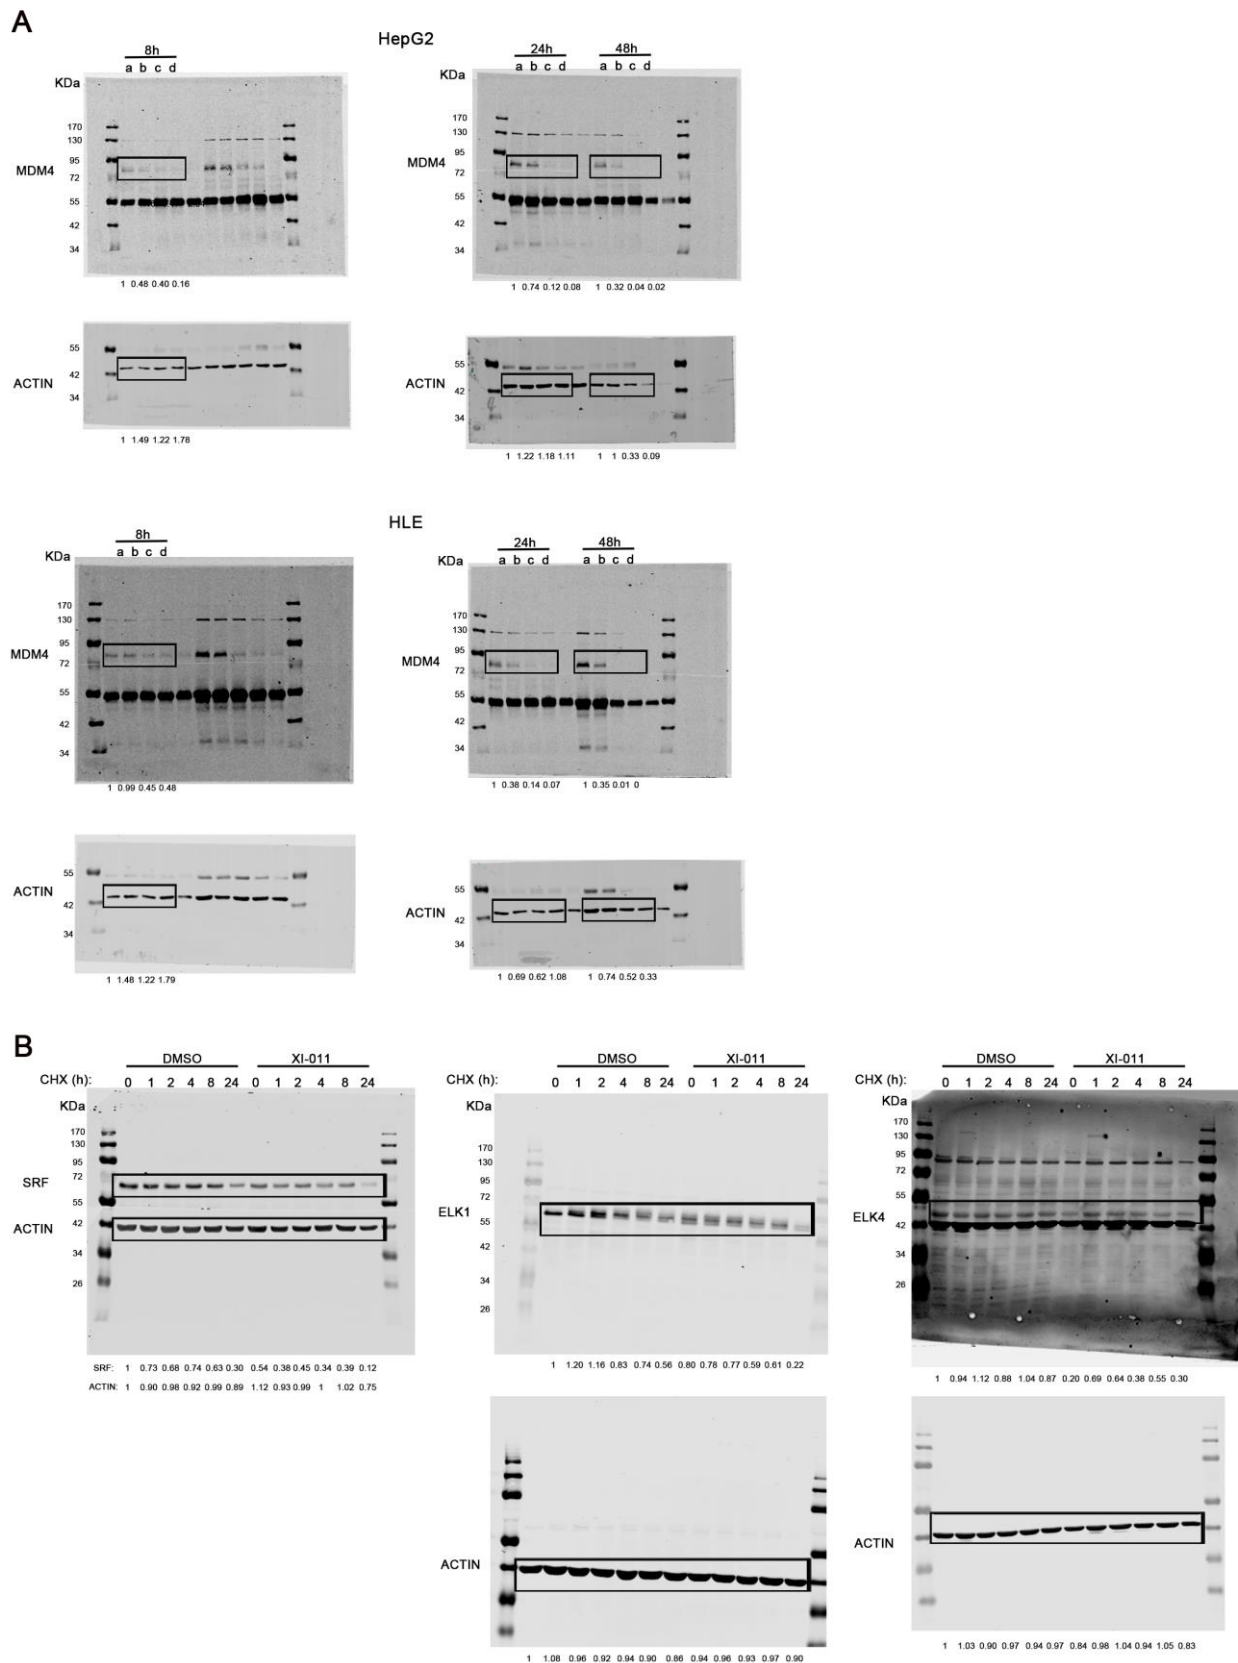

**Figure S14.** Western blotting image source. **(A)** Original Western blots included in Figure S5A. **(B)** Original Western blots shown in Figure S6A. Densitometric quantification is indicated below each corresponding band following comparison with DMSO control (a). Abbreviations: a, DMSO; b, 0.2  $\mu$ M XI-011; c, 0.5  $\mu$ M XI-011; d, 1  $\mu$ M XI-011; CHX, cycloheximide.

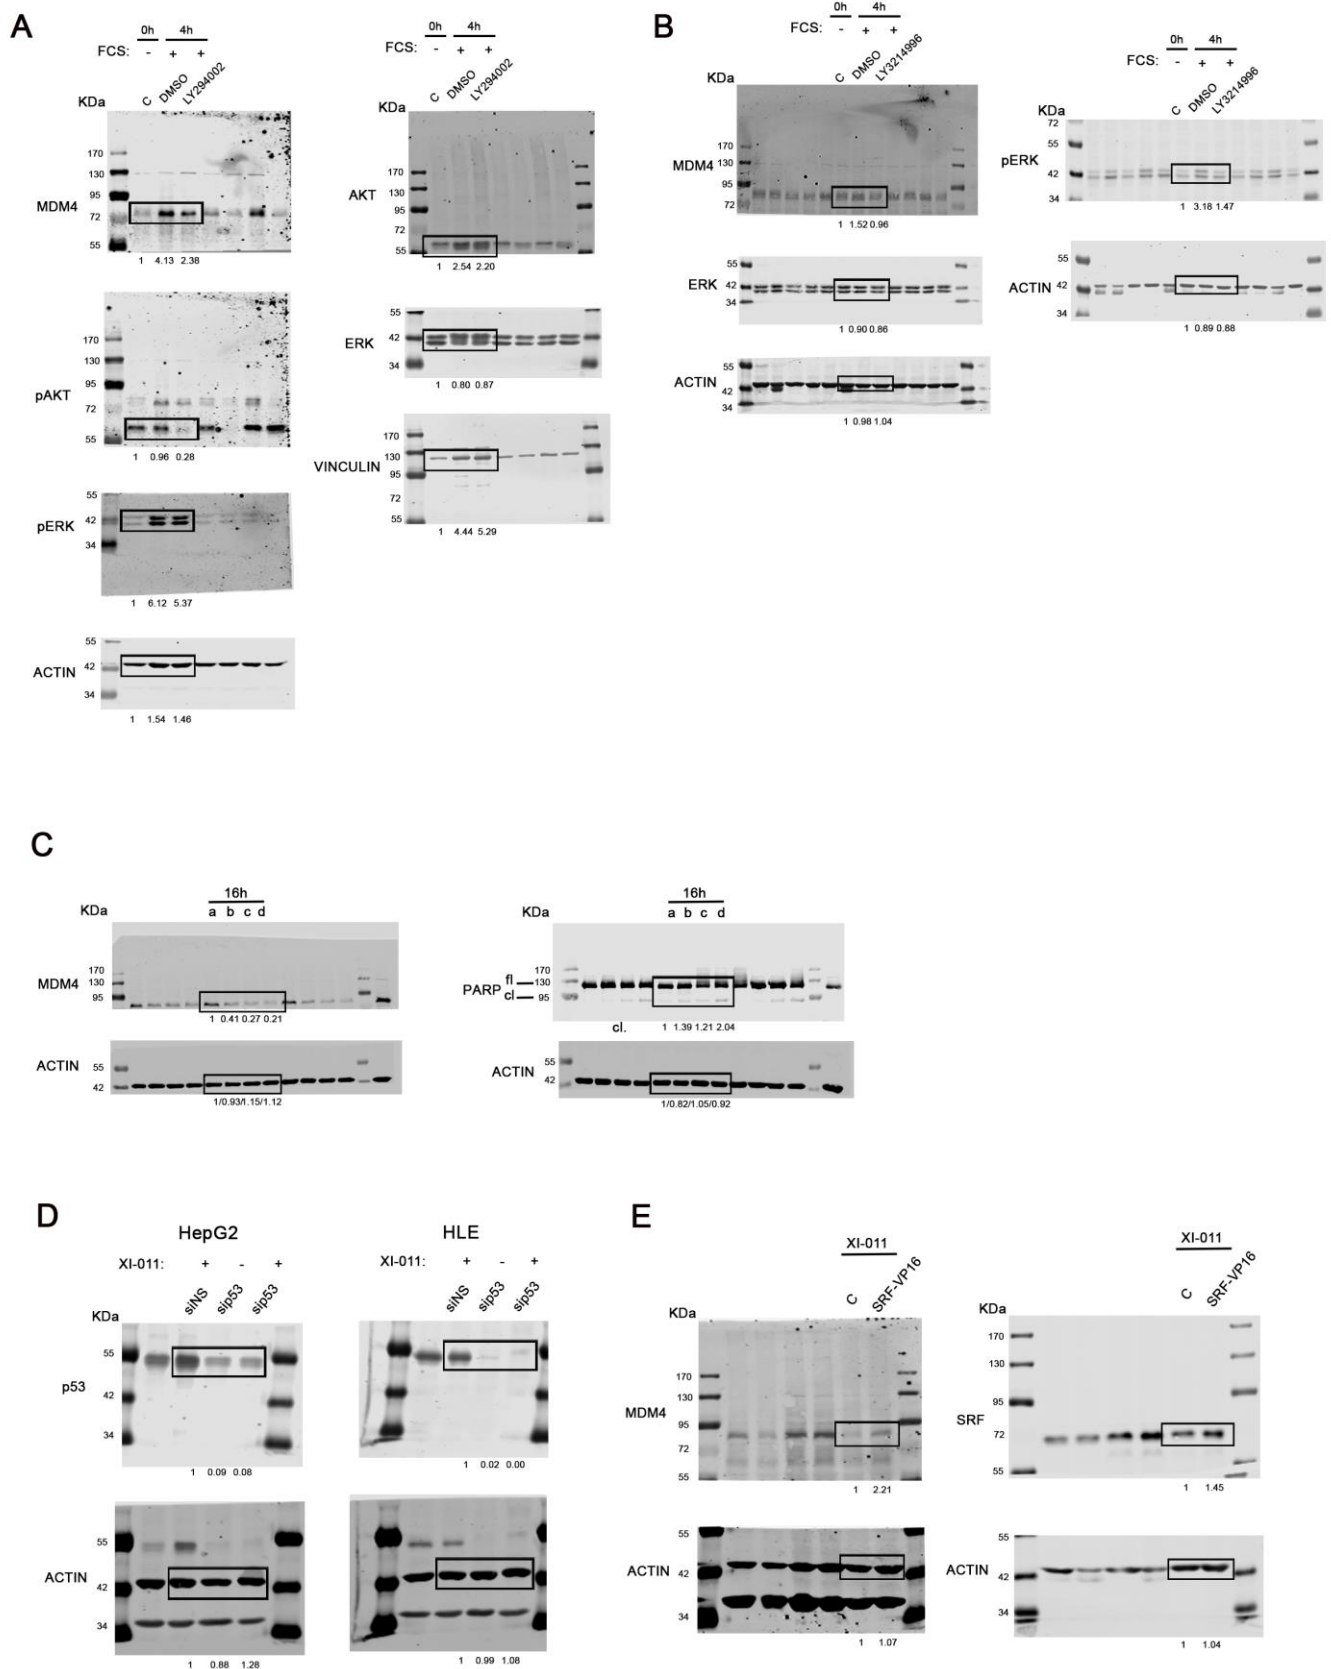

**Figure S15.** Western blotting image source. (A–B) Western blots displayed in Figure S3C. and E. (C–D) Western blots shown in Figure S5C and G. (E) Original Western blots included in Figure S6C. Abbreviations: a, DMSO; b, 0.2  $\mu$ M XI-011; c, 0.5  $\mu$ M XI-011; d, 1  $\mu$ M XI-011; siNS, scrambled, nonsense siRNA; siP53, siRNA specifically targeting p53; fl, full-length PARP protein; cl, cleaved PARP protein.

**Table S1.** Clinicopathological features of HCC patients (for Figure.1A,C).

| <b>Variables</b>              | <b>Features</b> |
|-------------------------------|-----------------|
| <b>Gender</b>                 |                 |
| male                          | 27 (73%)        |
| female                        | 10 (27%)        |
| <b>Median age</b> (range)     | 57 (16–78)      |
| <b>Etiology</b>               |                 |
| HBV                           | 8 (22%)         |
| HCV                           | 9 (24%)         |
| alcohol                       | 6 (16%)         |
| cryptogenic                   | 11 (30%)        |
| others                        | 3 (8%)          |
| <b>Grading</b>                |                 |
| well differentiated HCC       | 5 (13%)         |
| moderately differentiated HCC | 28 (76%)        |
| poorly differentiated HCC     | 4 (11%)         |
| <b>Tumor size</b>             |                 |
| <2.0 cm                       | 1 (3%)          |
| 2.0–5.0 cm                    | 19 (56%)        |
| >5.0 cm                       | 14 (41%)        |
| <b>UICC stage</b>             |                 |
| I                             | 25 (71%)        |
| II                            | 8 (23%)         |
| III                           | 0 (0%)          |
| IV                            | 2 (6%)          |
| <b>Vascular invasion</b>      |                 |
| present                       | 10 (29%)        |
| <b>Liver cirrhosis</b>        |                 |
| present                       | 18 (56%)        |

**Table S2.** Clinicopathological features of HCC patients (for Figure 1D, Figure S1/S2)

| <b>Variables Features</b>                                          |  | <b>HCCB <sup>a</sup></b> | <b>HCCP <sup>b</sup></b> |
|--------------------------------------------------------------------|--|--------------------------|--------------------------|
| <b>No. of patients</b>                                             |  | 14                       | 18                       |
| Male                                                               |  | 11                       | 12                       |
| Female                                                             |  | 3                        | 6                        |
| <b>Age (Mean ± SD)</b>                                             |  | 66.7 ± 7.9               | 66.5 ± 11.4              |
| <b>Etiology</b>                                                    |  |                          |                          |
| HBV                                                                |  | 7                        | 9                        |
| HCV                                                                |  | 4                        | 6                        |
| Ethanol                                                            |  | 3                        | 3                        |
| <b>Cirrhosis</b>                                                   |  |                          |                          |
| +                                                                  |  | 11                       | 13                       |
| -                                                                  |  | 3                        | 5                        |
| <b>Tumor size</b>                                                  |  |                          |                          |
| >5 cm                                                              |  | 11                       | 14                       |
| <5 cm                                                              |  | 3                        | 4                        |
| <b>Edmondson and Steiner grade</b>                                 |  |                          |                          |
| II                                                                 |  | 4                        | 5                        |
| III                                                                |  | 7                        | 6                        |
| IV                                                                 |  | 3                        | 7                        |
| <b>Alpha-fetoprotein secretion</b>                                 |  |                          |                          |
| >300 ng/mL of serum                                                |  | 6                        | 5                        |
| <300 ng/mL of serum                                                |  | 8                        | 13                       |
| <b>Survival after partial liver resection (months, Means ± SD)</b> |  | 60.2 ± 20.4              | 15.5 ± 10.5              |

<sup>a</sup>HCCB, HCC with better prognosis/longer survival (survival >3 years following partial liver resection). <sup>b</sup>HCCP, HCC with poorer prognosis/shorter survival (survival <3 years following partial liver resection).

**Table S3.** List of the primary antibodies.

| <b>ELK1</b>        | <b>Mouse Monoclonal</b> | <b>COOH Terminus</b>               | <b>Santa Cruz Biotechnology<br/>(Santa Cruz, CA, USA)</b> |
|--------------------|-------------------------|------------------------------------|-----------------------------------------------------------|
| pELK1 Ser383 (IHC) | Rabbit Polyclonal       | region between residues 365–405    | Abcam (Cambridge, MA, USA)                                |
| MDM4 (WB)          | Rabbit Monoclonal       | region between residues 125–175    | Bethyl Laboratories<br>(Montgomery, TX, USA)              |
| MDM4 (IHC)         | Rabbit Polyclonal       | region between residues 125–175    | Sigma-Aldrich<br>(St. Louis, MO, USA)                     |
| ELK4 (SAP-1a)      | Rabbit Polyclonal       | Amino acids 154–320                | Santa Cruz Biotechnology<br>(Santa Cruz, CA, USA)         |
| ELK4 (SAP-1a, IHC) | Rabbit Polyclonal       | Amino acids 154–320                | Novus Biologicals<br>(Centennial, CO, USA)                |
| SRF (WB)           | Rat Monoclonal          | Full length                        | Active Motif (La Hulpe, Belgium)                          |
| SRF (ChIP)         | Rabbit Polyclonal       | COOH terminus                      | Santa Cruz Biotechnology<br>(Santa Cruz, CA, USA)         |
| β-ACTIN            | Mouse Monoclonal        | NH2 terminus                       | Sigma-Aldrich (St. Louis, MO)                             |
| MDM2               | Mouse Monoclonal        | Amino acids 154–167                | Santa Cruz Biotechnology<br>(Santa Cruz, CA, USA)         |
| p53                | Mouse Monoclonal        | Amino acids 11–25                  | Santa Cruz Biotechnology<br>(Santa Cruz, CA, USA)         |
| PARP               | Rabbit Polyclonal       | Caspase cleavage site              | Cell Signaling (Danvers, MA)                              |
| GAPDH              | Mouse Monoclonal        | Full length                        | Bio-Rad Laboratories<br>(Hercules, CA)                    |
| ERK                | Rabbit Polyclonal       | COOH terminus                      | Cell Signaling (Danvers, MA, USA)                         |
| pERK               | Rabbit Polyclonal       | Residues surrounding Thr202/Tyr204 | Cell Signaling (Danvers, MA, USA)                         |
| AKT                | Rabbit Polyclonal       | COOH terminus                      | Cell Signaling (Danvers, MA, USA)                         |
| pAKT               | Rabbit Monoclonal       | Residues around Ser473             | Cell Signaling (Danvers, MA, USA)                         |
| VINCULIN           | Mouse Monoclonal        | Full length                        | Sigma-Aldrich<br>(St. Louis, MO, USA)                     |

**Table S4.** Primer and siRNA sequence list.

|                                      |                                                   |
|--------------------------------------|---------------------------------------------------|
| MDM4-fw                              | 5'-TCAGGTACGACCAAAACTGCC-3'                       |
| MDM4-rev                             | 5'-AGTGCATGACCTCTTTAACAGTG-3'                     |
| SRF-fw                               | 5'-GTCTCCTCTGGGGGCCTTA-3'                         |
| SRF-rev                              | 5'-GCACTTGAATGGCCTGCAC-3'                         |
| ELK1-fw                              | 5'-ACCCATCTGTGACGCTGTG-3'                         |
| ELK1-rev                             | 5'-TCCCGTGAAGTCCAGGAGAT-3'                        |
| ELK4-fw                              | 5'-AGCAGAGTTCAATTTGGGAATGC-3'                     |
| ELK4-rev                             | 5'-AACCAACAAATCTGTACCTGGC-3'                      |
| MDM4 (human HCC samples)             | Hs00910358_s1 (TaqMan, Thermo Fischer Scientific) |
| SRF (human HCC samples)              | Hs01065256_m1 (TaqMan, Thermo Fischer Scientific) |
| ELK1 (human HCC samples)             | Hs00901847_m1 (TaqMan, Thermo Fischer Scientific) |
| ELK4 (human HCC samples)             | Hs00360813_m1 (TaqMan, Thermo Fischer Scientific) |
| Mdm4-fw (murine samples)             | 5'-CTGTCTGGCTTCCTTTGTGG-3'                        |
| Mdm4-rev (murine samples)            | 5'-CTAAAGCGCTGCATCTCCTC-3'                        |
| Gapdh-fw (murine samples)            | 5'-TGGATCTGACGTGCCGC-3'                           |
| Gapdh-rev (murine samples)           | 5'-TGCCGTCTTACCACCTT-3'                           |
| GAPDH-fw                             | 5'-TGCACCAACTGCTTAGC-3'                           |
| GAPDH-rev                            | 5'-GGCATGGACTGTGGTCATGAG-3'                       |
| VIM-fw                               | 5'-GGACCAGCTAACCAACGACA-3'                        |
| VIM-rev                              | 5'-TCCTCCTGCAATTTCTCCCG-3'                        |
| VCL1-fw                              | 5'-CGATTACGAACCTGAGCTGC-3'                        |
| VCL1-rev                             | 5'-GACCACTTGGTAGCTTCCCG-3'                        |
| ACTB-fw                              | 5'-CCTCGCCTTTGCCGATCC-3'                          |
| ACTB-rev                             | 5'-CGCGGCGATATCATCATCC-3'                         |
| BCL2-fw                              | 5'-CCCGCGACTCCTGATTCAAT-3'                        |
| BCL2-rev                             | 5'-AGTCTACTTCCTCTGTGATGTTGT-3'                    |
| cMYC-fw                              | 5'-TGGTGCTCCATGAGGAGACA-3'                        |
| cMYC-rev                             | 5'-GTGATCCAGACTCTGACCTT-3'                        |
| p21-fw                               | 5'-GGCGGCAGACCAGCATGACAGATT-3'                    |
| p21-rev                              | 5'-GCAGGGGGCGGCCAGGGTAT-3'                        |
| MDM2-fw                              | 5'-TCTGTGAGTGAGAACAGGTGTCAC-3'                    |
| MDM2-rev                             | 5'-ACACACAGAGCCAGCCTTTC-3'                        |
| p53-fw                               | 5'-TGAAGTGTACCACCATCCACT-3'                       |
| p53-rev                              | 5'-CCATGCAGGAAGTGTACAC-3'                         |
| 18s-fw                               | 5'-AAACGGCTACCACATCCAAG-3'                        |
| 18s-rev                              | 5'-CCTCCAATGGATCCTCGTTA-3'                        |
| ELK1_ELK4 ChIP_2-fw                  | 5'-CTCCATCTATGGTTTCCGGAGG-3'                      |
| ELK1_ELK4 ChIP_2-rev                 | 5'-GCAGCATTTTGAAATGGCGAG-3'                       |
| SRF_ChIP_3-fw                        | 5'-CTCCCCGGACTAGGATCTAC-3'                        |
| SRF_ChIP_3-rev                       | 5'-AGGCCTCCGGAACCATAGA-3'                         |
| upstream control ChIP-fw             | 5'-GCAGCTCATCAATCATTGCAC-3'                       |
| upstream control ChIP-rev            | 5'-CGGAAGCACCAATCTAGAGGA-3'                       |
| downstream control ChIP-fw           | 5'-ACCACAGTTTAAAAGCAACACCC-3'                     |
| downstream control ChIP-rev          | 5'-ACCAAGAGGTTCCAAGTATCTTT-3'                     |
| siELK1_1 (final concentration: 20nM) | 5'-UGAAAUCGGAAGAGCUUAA-dTdT-3'                    |
| siELK1_2 (final concentration: 20nM) | 5'-CGGAAGAGCUUAAUGUGGA-dTdT-3'                    |
| siSRF_1 (final concentration: 40nM)  | 5'-GUGAGACAGGCCAUGUGUA-dTdT-3'                    |
| siSRF_2 (final concentration: 40nM)  | 5'-UGAGUGCCACUGGCUUUGA-dTdT-3'                    |
| siELK4_1 (final concentration: 80nM) | 5'-UUCUCCAUCUUCAGAAGAA-dTdT-3'                    |
| siELK4_2 (final concentration: 80nM) | VHS40843 (Thermo Fisher Scientific)               |
| siMDM4 (final concentration: 40nM)   | 5'-AGCAACUAUACACCUAGAA-dTdT3'                     |
| sip53 (final concentration: 5nM)     | 5'-UGUUCGAGAGCUGAAUGA-dTdT3'                      |
| nonsense siRNA (siNS)                | 5'-UUCUCCGAACGUGUCACGU-dTdT-3'                    |
